# Supplementary material for: Highly sensitive mechanochromic photonic gel towards fast- responsive fingerprinting
Source: Royal Society of Chemistry journal article supplement (doi:10.1039/c7ra05622b), 2017-01-01
Supplement: c7ra05622b1.pdf [file c7ra05622b1.pdf]

## **High-sensitive Mechanochromic Photonic Gel toward Fast-responsive Fingerprinting**

Ri Hong,<sup>a†</sup> Yuqi Shi,<sup>b†</sup> Xiao-Qiao Wang,<sup>a†</sup> Lu Peng,<sup>a</sup> Xingjiang Wu,<sup>a</sup> Hengyang Cheng<sup>a</sup> and Su Chen<sup>a\*</sup>

<sup>a</sup>State Key Laboratory of Materials-Oriented Chemical Engineering, College of Chemical Engineering, Jiangsu Key Laboratory of Fine Chemicals and Functional Polymer Materials, Nanjing Tech University (former: Nanjing University of Technology), Nanjing 210009, P. R. China.

<sup>b</sup>School of chemical and material engineering, Fuyang Normal University, Fuyang 236001, P. R.China.

<sup>†</sup>Contribute equally to this work.

\*Corresponding author. E-mail:chensu@njtech.edu.cn.

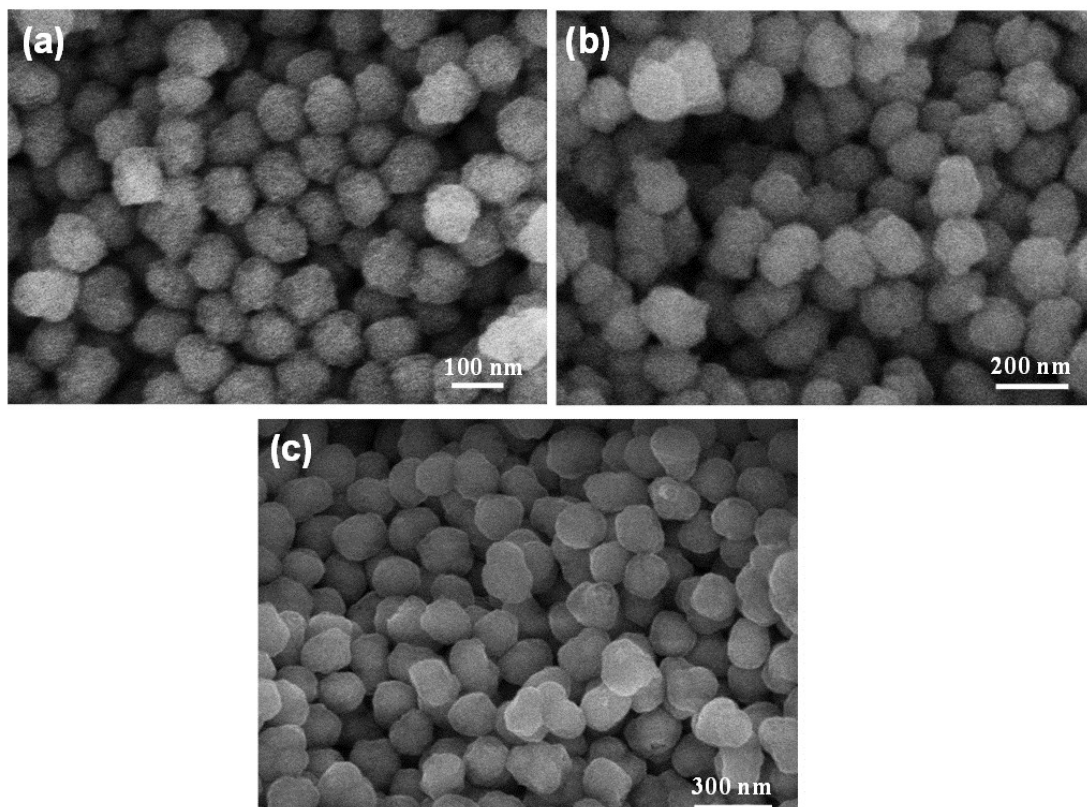

Fig. S1. SEM images of carbon-encapsulated  $\text{Fe}_3\text{O}_4$  nanoparticles with average diameter of  $\sim 90$  nm, 140 nm and 180 nm.

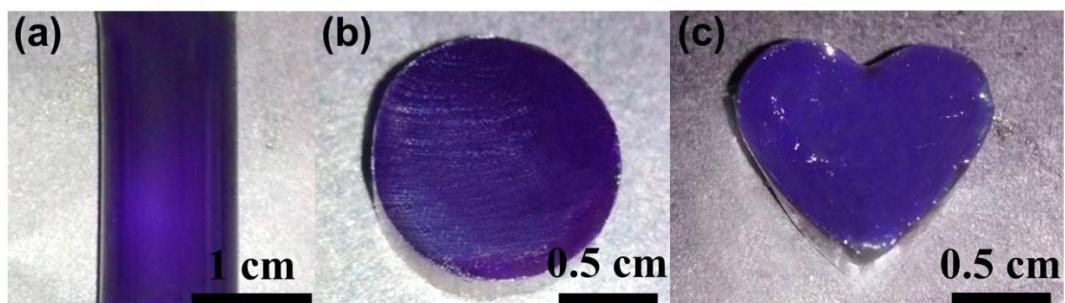

Fig. S2. cylindrical (a), sliced (b) and heart-shaped (c) photonic gels.

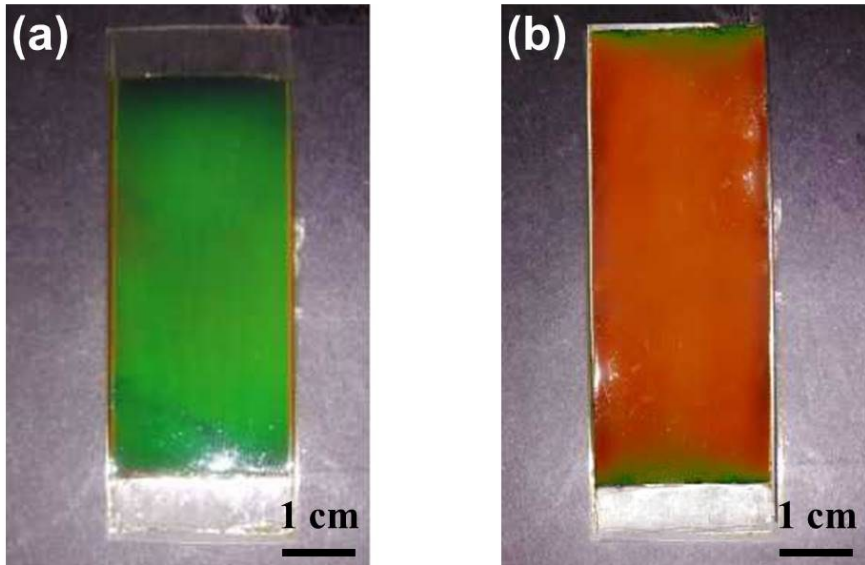

Fig. S3. Photographs of green (a), and red (b) photonic gel films on plastic substrate.

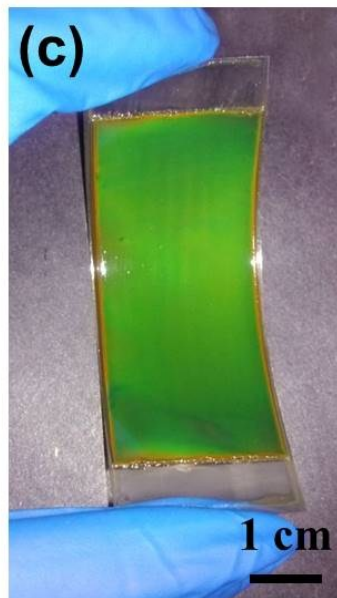

Fig. S4. Bendable green photonic gel film

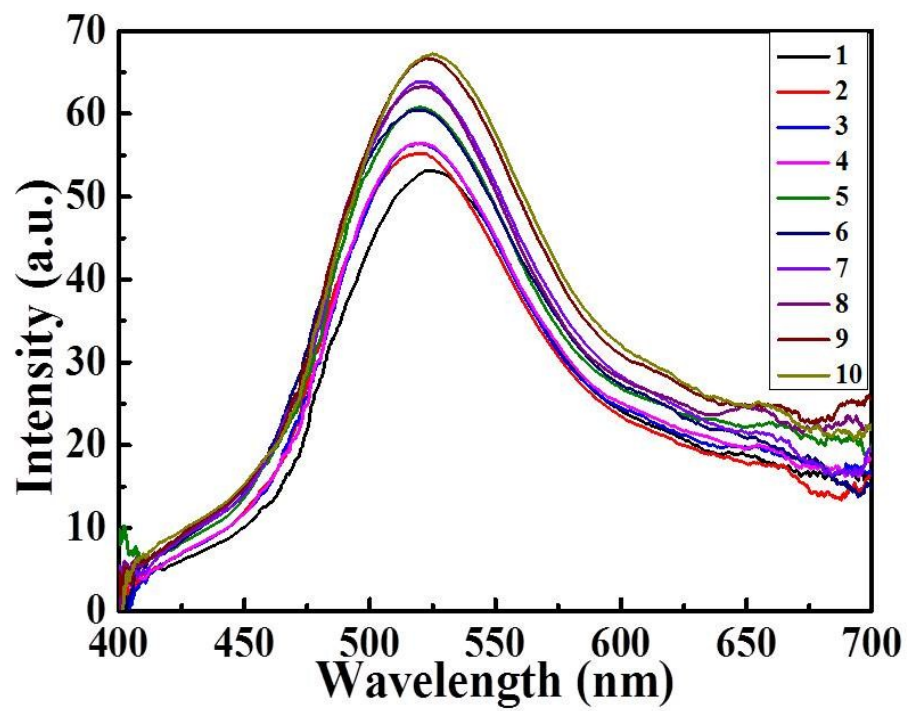

Fig. S5. Reflection spectra of 10 casual points on the green gel film.
